# Supplementary material for: Highly sensitive surface-enhanced Raman scattering using vertically aligned silver nanopetals
Source: Royal Society of Chemistry journal article supplement (doi:10.1039/c1ra00827g), 2011-12-19
Supplement: c1ra00827g.pdf [file c1ra00827g.pdf]

SUPPORTING INFORMATION

**Figure S1**

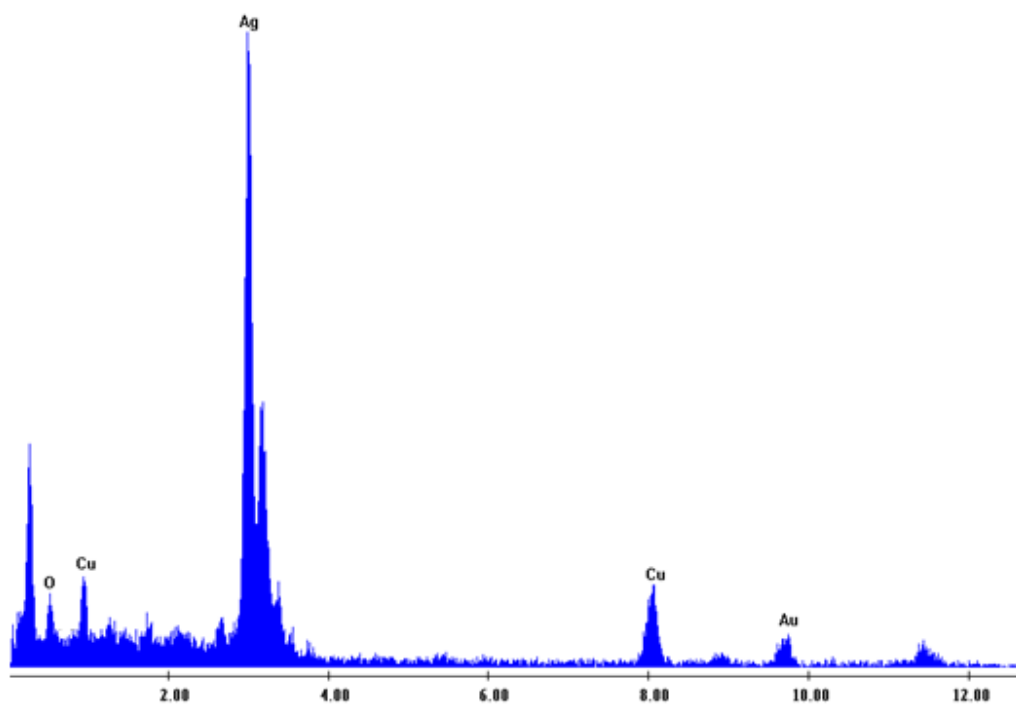

Figure S1. EDXS of one Ag nanopetal.

**Figure S2**

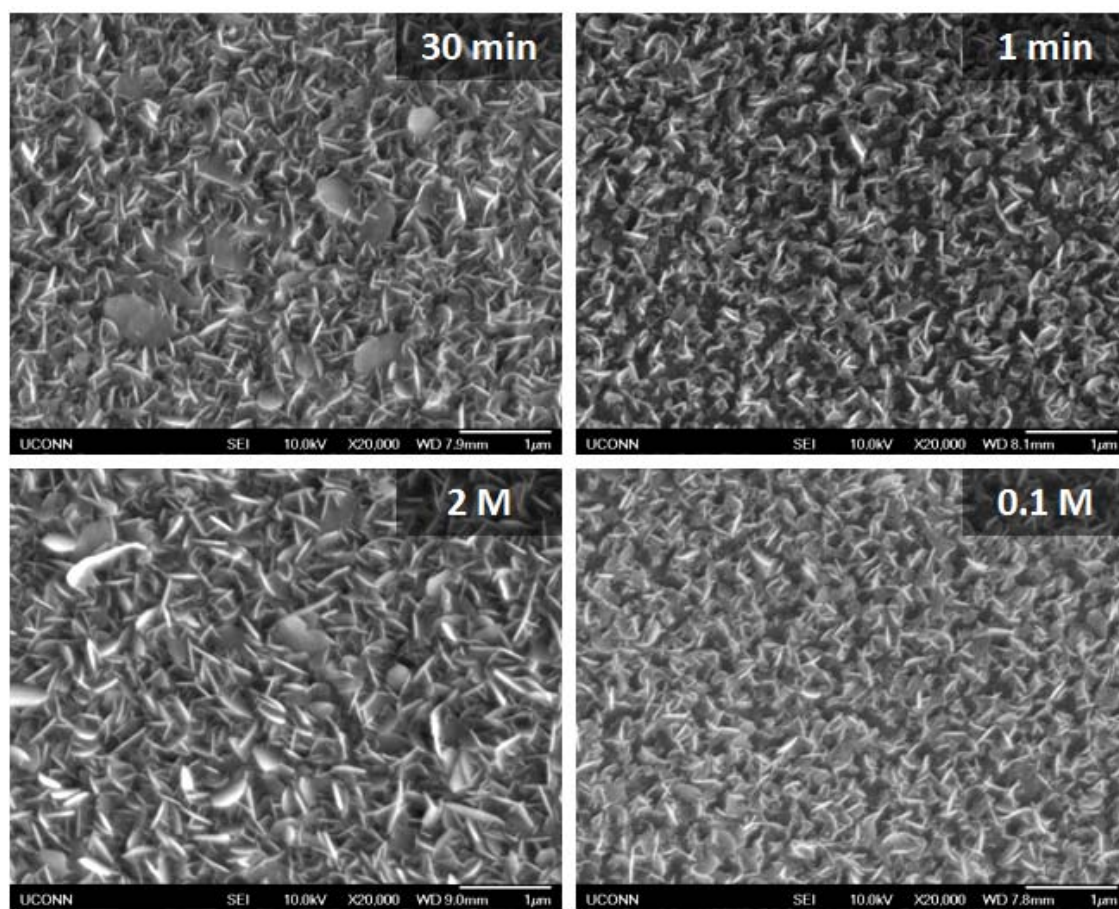

Figure S2. FESEM images of Ag thin films prepared by different times with 1 M AgNO<sub>3</sub> (top) and by different concentrations of AgNO<sub>3</sub> for 5 min (bottom).

**Figure S3**

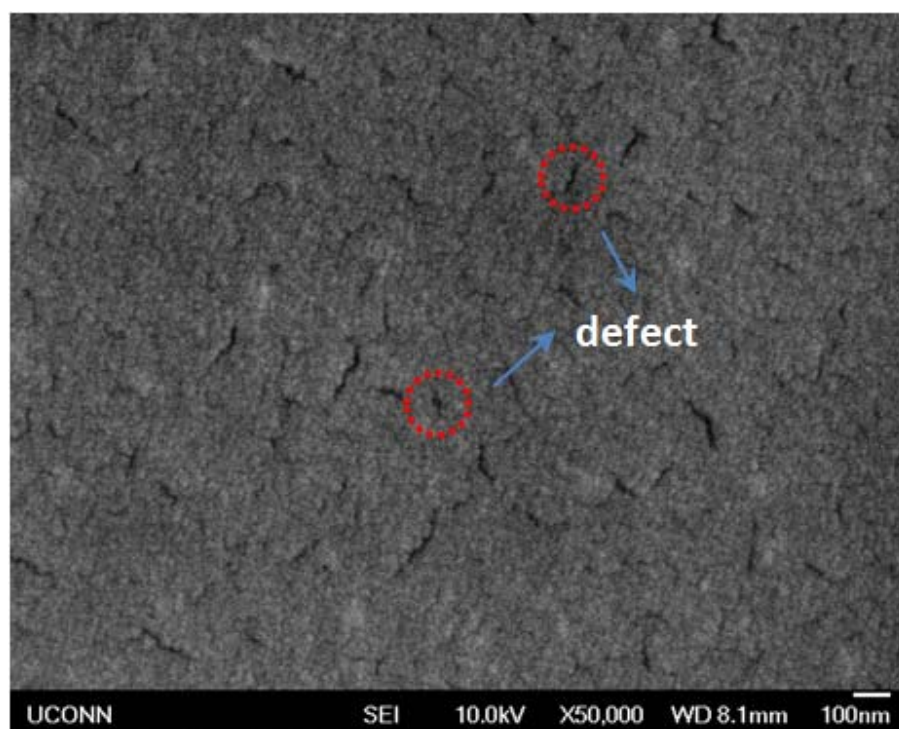

Figure S3. FESEM of the surface of the thermal evaporated Cu template with defects.

Figure S4

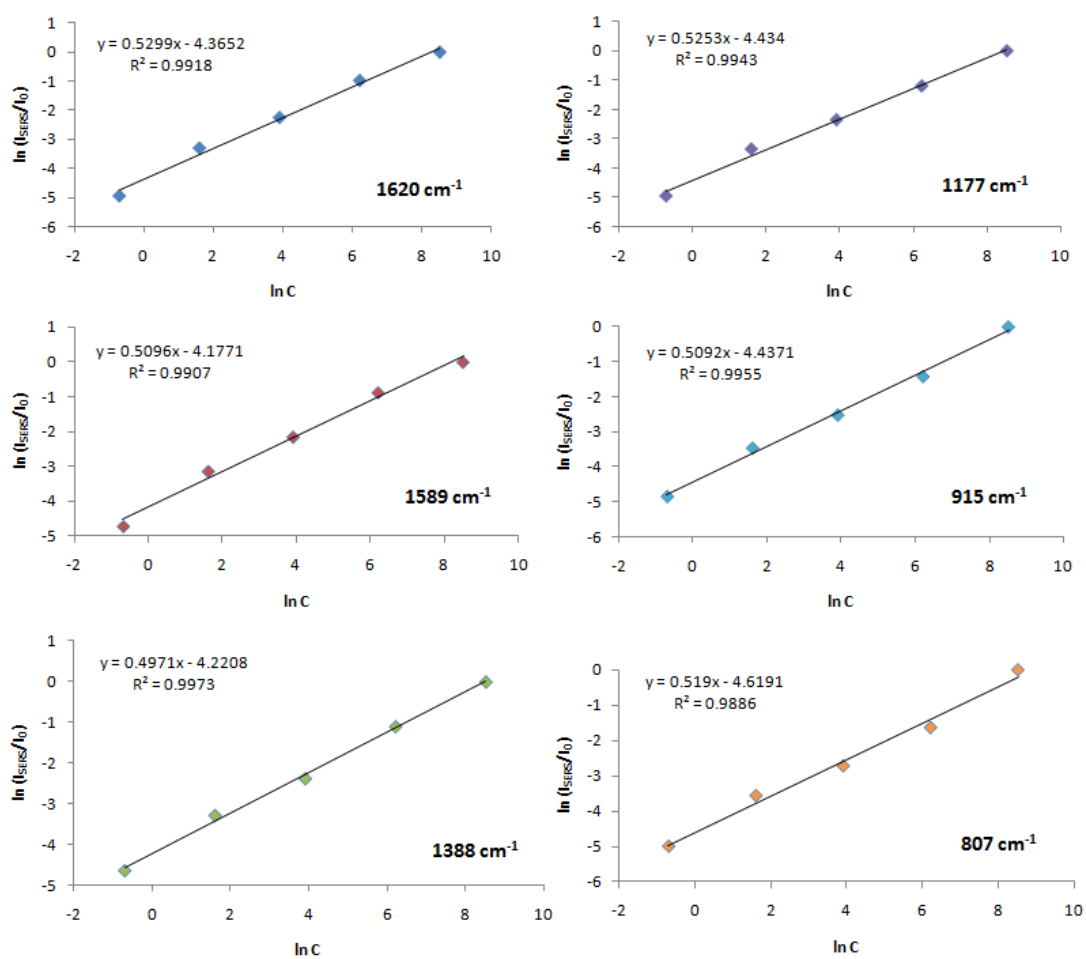

Figure S4. The plots of  $\ln(I_{\text{SERS}}/I_0)$  versus  $\ln C$  at different frequency for the derivation of a, b, and  $R^2$  in Table 1.

**Figure S5**

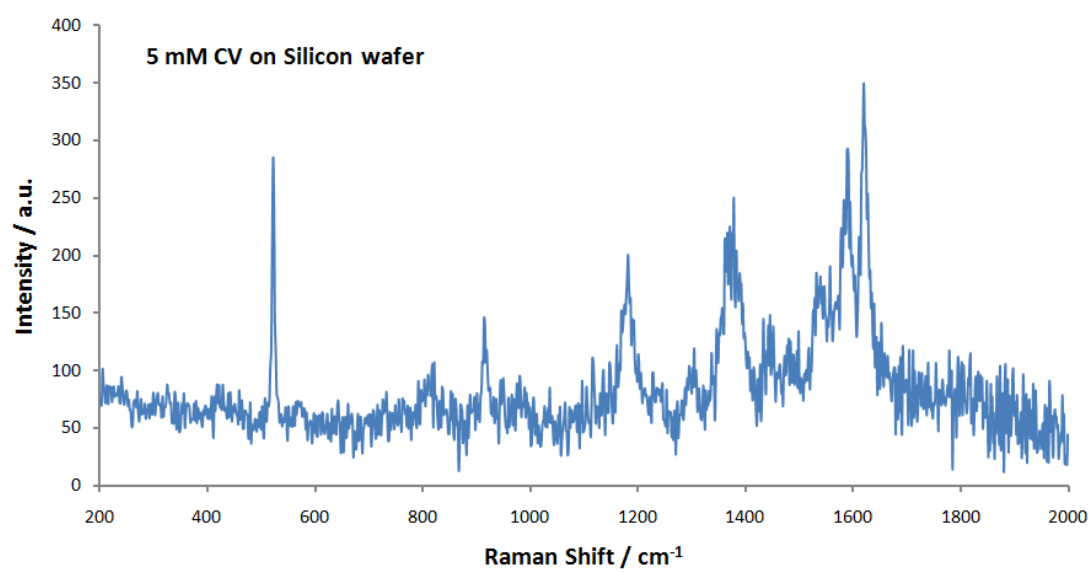

Figure S5. Raman spectrum of 5 mM CV on non-enhanced Si wafer.
